# Supplementary material for: Comparative efficacy of titanium oxide nanoparticles and zinc oxide nanoparticles against lead tolerance, growth performance and nutrient profiling of Brassica Napus L. grown under Lead contaminated soil
Source: Research Square preprint supplement (doi:10.21203/rs.3.rs-3684389/v1), 2024-01-16
Supplement: Supplementary file 1 [file 2b7421e376285e8d862318b7.docx]

**Highlights**

- Lead (Pb) toxicity impairs plant growth through severe oxidative damage and threatens food security.
- ZnO NPs and TiO2 NPs foliar application displayed significant potential to improve growth and physiology of *Brassica napus* L.
- TiO2 NPs significantly reduced Pb induced toxicity by enhancing plant antioxidant enzyme activity.
- ZnO NPs and TiO2 NPs foliar application boosted plant nutrient content.
- Nanoparticles are effective strategy to alleviate Pb stress and to improve plant nutritional quality.
